# Supplementary material
Source: MDPI journal article supplement (https://www.mdpi.com/2306-5729/8/4/71)
Supplement: s1 [file s1]

# Proteomic shotgun and targeted mass-spectrometric datasets of cerebrospinal fluid (liquor) derived from patients with vestibular schwannoma (Supplementary material)

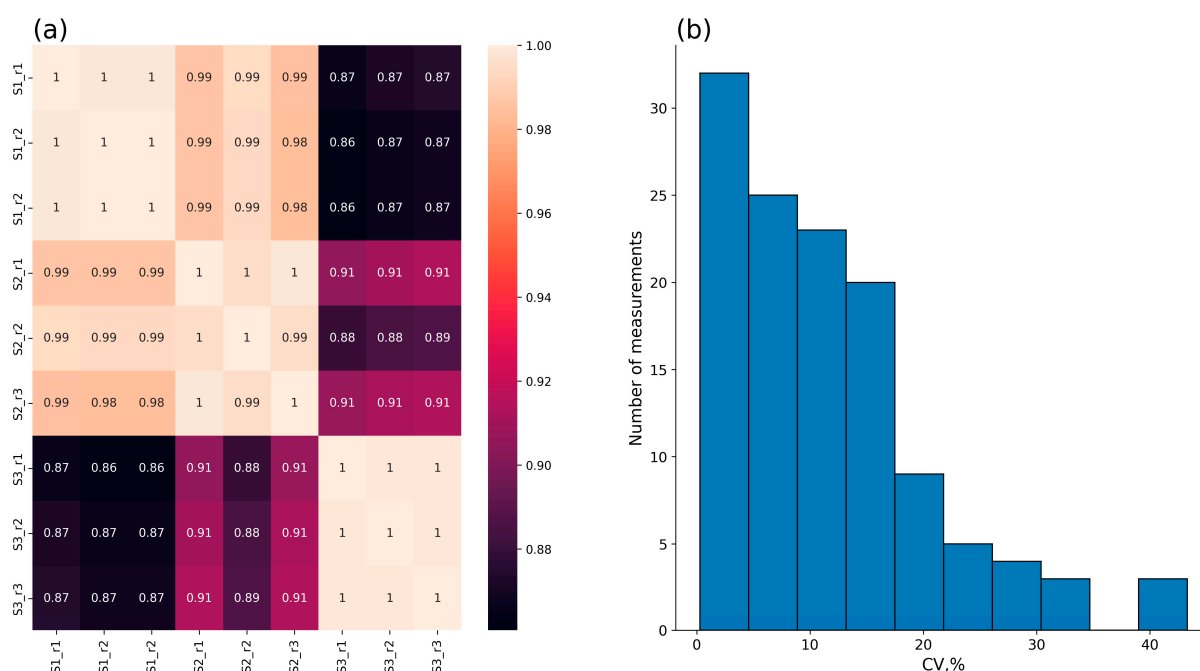

Figure S1. The results of MRM/SIS analysis of three samples (5 fraction per each sample) in three technical replicates; (a) correlation matrix of samples and replicates; (b) distribution of the coefficient of variation (CV, %) for measurements performed in three technical replicates
